# Supplementary material
Source: PubMed Central journal article supplement (PMC8420962)
Supplement: 41415_2021_3375_MOESM1_ESM.pdf [file 41415_2021_3375_MOESM1_ESM.pdf]

## **Demographic data and interview guide**

**Gender:**

**Role:**

**City:**

**Full time or part time:**

**Responsibilities (at previous role):**

**Years of clinical experience:**

**City:**

**Setting:**

**Start date of work at UDCs:**

**Full time or part time:**

**Role in the UDC:**

## *Interview guide*

1. **Please can you tell me how did your work at UDC come about?**  
Voluntary, redeployment, other. Do you feel the procedures and responsibilities were communicated to you effectively?
2. **Did you have any expectations before joining the UDC and how does this compare with your role as it currently stands?**
3. **Please can you describe what is a day like for you at UDC?** (in terms of responsibilities, role, number of patients).
4. **Please can you tell me about your experience of working at the UDC?**  
(Any thoughts in terms of the referral mechanism from other practices; referral of patients who do not have a dentist; working together with your dental nurse, fit testing and others)
5. **Has your work at UDC changed at all over the course of the pandemic?**
6. **How did you find the clinical encounter with the patient as regards to communication and clinical management?**
7. **What, if any, are the positive or negative impacts of your involvement in the UDCs?** Do you feel there was impact upon yourself in terms of health and wellbeing?
8. **What, if any, are the challenges/difficulties in your role and barriers to providing care?**
  - Design, fitting, availability and use of PPE including IPC protocols
  - Practice organisation and risk assessment
  - Patient communication and consent procedures
  - Training needs and clinical support
9. **What in your view has worked well during your service at UDC?** (e.g. this could be for example about coordination, team work and others)
10. **Could you please identify ways, if any, that your work at UDC could be made easier or ways that the operation of the UDCs can be improved?' etc.** (facilitators)
11. **Any comments in terms of:**
  - *Design, fitting, availability and use of PPE including IPC protocols*

- *Practice organisation and risk assessment*
- *Patient communication and consent procedures*
- *Training needs and clinical support*

**12. Do you feel that UDC hubs are worthwhile, in what aspects and how do you see their future?**

**13. How do you feel about the current and future care of your own patients?**

**14. Do you see any changes ahead, in terms of dental services (e.g. waiting list, service delivery, the way you work)?**

**15. Do you have any other thoughts or recommendations about the way forward and the transition of dental services back to normal?**

**16. Thank you very much for sharing your experiences and for your service. I have nothing else to ask- is there anything else you would like to add?**
